# Supplementary material for: Prevalence of Physical Frailty and Its Multidimensional Risk Factors in Korean Community-Dwelling Older Adults: Findings from Korean Frailty and Aging Cohort Study
Source: PubMed Central journal article supplement (PMC7662797; doi:10.3390/ijerph17217883), 2020-10-27
Supplement: ijerph-17-07883-s001.pdf [file ijerph-17-07883-s001.pdf]

Supplementary materials

**Table S1.** Criteria used to define physical frailty

|                     | CHS                                                                                                                                                                                                                                                                                                                                                                                                                                                                                       | KFACS                                                                                                                                                                                                                                                                                                                                                                                                                                                                      |
|---------------------|-------------------------------------------------------------------------------------------------------------------------------------------------------------------------------------------------------------------------------------------------------------------------------------------------------------------------------------------------------------------------------------------------------------------------------------------------------------------------------------------|----------------------------------------------------------------------------------------------------------------------------------------------------------------------------------------------------------------------------------------------------------------------------------------------------------------------------------------------------------------------------------------------------------------------------------------------------------------------------|
| <b>Weight loss</b>  | In the last year, have you lost more than 10 pounds(4.54kg) unintentionally?<br><input type="checkbox"/> No <input type="checkbox"/> Yes<br>If answer is yes, this criterion is positive.                                                                                                                                                                                                                                                                                                 | Same as in CHS                                                                                                                                                                                                                                                                                                                                                                                                                                                             |
| <b>Weakness</b>     | Grip strength stratified by gender and BMI quartiles: JAMAR hydraulic hand dynamometer (lowest 20%)<br>Men<br>BMI ≤24.0...≤29.0 kg<br>BMI 24.1–26.0...≤30.0 kg<br>BMI 26.1–28.0...≤30.0 kg<br>BMI >28.0...≤32.0 kg<br>Women<br>BMI ≤23.0...≤17.0 kg<br>BMI 23.1–26.0...≤17.3 kg<br>BMI 26.1–29.0...≤18.0 kg<br>BMI >29.0...≤21.0 kg<br>If grip strength is lower than these respective cut-offs, the criterion is positive                                                                | Grip strength stratified by gender and BMI quartiles: Digital Smedley Dynamometer (T.K.K.5401, Takei Scientific Inc. Co., Ltd., Japan) (lowest 20%)<br>Men<br>BMI <22.0...≤25.4 kg<br>BMI 22.0–23.9...≤27.1 kg<br>BMI 24.0–25.9...≤27.8 kg<br>BMI >26.0...≤28.5 kg<br>Women<br>BMI <23.0...≤16.8 kg<br>BMI 23.0–24.9...≤17.6 kg<br>BMI 25.0–26.9...≤17.8 kg<br>BMI >27.0...≤17.7 kg<br>If grip strength is lower than these respective cut-offs, the criterion is positive |
| <b>Exhaustion</b>   | Using the CES-D, the following two statements are read asking how often in the last week did you feel this way?<br><ul style="list-style-type: none"> <li>• I felt that everything I did was an effort</li> <li>• I could not get going</li> </ul> 0 = rarely or none time (<1 day)<br>1 = some or little time (1–2 days)<br>2 = a moderate amount of the time (3–4days)<br>3 = most of the time<br>Persons answering “2” or “3” to either of these questions are categorized as positive | Same as in CHS                                                                                                                                                                                                                                                                                                                                                                                                                                                             |
| <b>Slowness</b>     | Gait speed stratified by gender and height (gender-specific cutoff a medium height): 4.57-m usual gait speed (lowest 20%)<br>Men<br>Height ≤173.0 cm ...≤ 0.76 m/s<br>Height >173.0 cm ...≤ 0.65 m/s<br>Women<br>Height ≤159.0 cm ...≤ 0.76 m/s<br>Height >159.0 cm ...≤ 0.65 m/s<br>If gait speed is lower than these respective cut-offs, the criterion is positive                                                                                                                     | Gait speed stratified by gender and height (gender-specific cutoff a medium height): 4-m usual gait speed (lowest 20%)<br>Men<br>Height ≤165.0 cm ...≤ 0.93 m/s<br>Height >165.0 cm ...≤ 0.98 m/s<br>Women<br>Height ≤152.0 cm ...≤ 0.85 m/s<br>Height >152.0 cm ...≤ 0.93 m/s<br>If gait speed is lower than these respective cut-offs, the criterion is positive                                                                                                         |
| <b>Low activity</b> | Kcal of leisure physical activity stratified by gender: MLTAQ<br>Men <383 Kcal<br>Women <270 Kcal<br>If Kcal of leisure physical are under these respective cut-offs, the criterion is positive                                                                                                                                                                                                                                                                                           | Kcal of self-report of physical activity stratified by gender: IPAQ-SF Population-based Korean survey of older adults (lowest 20%) <sup>a</sup><br>Men <495.65 Kcal<br>Women <283.50 Kcal<br>If Kcal of leisure physical are under these respective cut-offs, the criterion is positive                                                                                                                                                                                    |

BMI, body mass index; CES-D, Center for Epidemiological Studies-Depression Scale; CHS, Cardiovascular Health Study; IPAQ-SF, the International Physical Activity Questionnaire - Short Form; KFACS, Korean Frailty and Aging Cohort Study; MLTAQ, the Minnesota Leisure Time Activities Questionnaire. <sup>a</sup>Ministry of Health and Welfare. Survey on health and welfare status of the elderly in Korea 2008 [Internet]. Seoul: Ministry of Health and Welfare; 2012. cited 2009 Jul 13. Available from: <http://www.mw.go.kr/>.

**Table S2.** Prevalence of frailty status and component (unstandardized sample)

| Variable                  | Unstandardized sample, n (%) |                           |                             | <i>p</i> Value   |
|---------------------------|------------------------------|---------------------------|-----------------------------|------------------|
|                           | Overall<br>n=2,907           | Men<br>n=1,383<br>(47.6%) | Women<br>n=1,524<br>(52.4%) |                  |
| <b>Frailty status</b>     |                              |                           |                             |                  |
| Robust                    | 1313 (45.2)                  | 695 (50.3)                | 618 (40.6)                  |                  |
| Pre-frail                 | 1366 (47.0)                  | 590 (42.7)                | 776 (50.9)                  | <b>&lt;0.001</b> |
| Frail                     | 228 (7.8)                    | 98 (7.1)                  | 130 (8.5)                   |                  |
| <b>Frailty component</b>  |                              |                           |                             |                  |
| Exhaustion                | 915 (31.5)                   | 306 (33.4)                | 609 (66.4)                  | <b>&lt;0.001</b> |
| Low physical activity     | 310 (10.7)                   | 153 (11.1)                | 157 (10.3)                  | 0.507            |
| Slowness                  | 590 (20.3)                   | 284 (20.5)                | 306 (20.1)                  | 0.760            |
| Weakness                  | 588 (20.0)                   | 281 (20.3)                | 307 (20.1)                  | 0.907            |
| Unintentional weight loss | 141 (4.9)                    | 74 (5.4)                  | 67 (4.4)                    | 0.232            |
| <b>Frailty score</b>      |                              |                           |                             |                  |
| 0                         | 1313 (45.2)                  | 695 (50.3)                | 618 (40.6)                  |                  |
| 1                         | 936 (32.2)                   | 404 (29.2)                | 532 (34.9)                  |                  |
| 2                         | 430 (14.8)                   | 186 (13.4)                | 244 (16.0)                  |                  |
| 3                         | 168 (5.8)                    | 71 (5.1)                  | 97 (6.4)                    | <b>&lt;0.001</b> |
| 4                         | 56 (1.9)                     | 26 (1.9)                  | 30 (2.0)                    |                  |
| 5                         | 4 (0.1)                      | 1 (0.1)                   | 3 (0.2)                     |                  |

*p* < 0.05 indicated in bold.

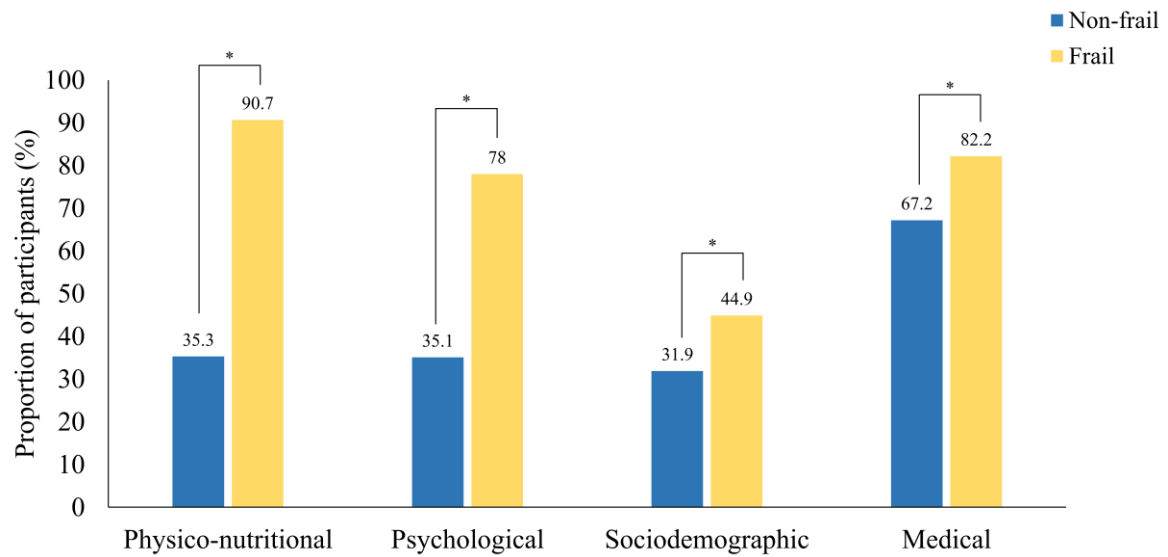

**Figure S1.** The proportion of risk domains across the frailty status (unstandardized sample); The frailty status was classified into non-frail and frail. The physico-nutritional domain was defined as having  $\geq 1$  risk of malnutrition, sarcopenia, severe mobility limitation, longer timed up and go ( $>12$  seconds), and low short physical performance battery ( $\leq 9$  scores). The psychological domain was defined as having  $\geq 1$  depressive symptom and poor self-perceived health. The sociodemographic domain was defined as having  $\geq 1$  of rural residence and poor social capital. The medical domain was defined as having  $\geq 1$  of polypharmacy, elevated hs-CRP ( $\geq 3$  mg/L), elevated HbA1c ( $\geq 6.5\%$ ), and low 25-hydroxyvitamin D ( $\leq 20$  ng/mL). \*  $p < 0.001$ .
